# Supplementary material for: Research trends in complementary and alternative treatments for insomnia over the past decade: A bibliometrics analysis
Source: PubMed Central journal article supplement — Medicine (Baltimore). 2023 Jul 21;102(29):e34346. doi: 10.1097/MD.0000000000034346 (PMC10662862; doi:10.1097/md.0000000000034346), 2023-07-21
Supplement: medi-102-e34346-s002.pdf [file medi-102-e34346-s002.pdf]

**Supplementary Figure. High-frequency keywords**

| Keywords |                             |           |               |               |
|----------|-----------------------------|-----------|---------------|---------------|
| No.      | Keywords                    | Frequency | Percentage, % | Cumulative, % |
| 1        | insomnia                    | 237       | 3.1399        | 3.1399        |
| 2        | mindfulness                 | 196       | 2.5967        | 5.7366        |
| 3        | sleep                       | 193       | 2.5570        | 8.2936        |
| 4        | acupuncture                 | 155       | 2.0535        | 10.3471       |
| 5        | depression                  | 129       | 1.7091        | 12.0562       |
| 6        | anxiety                     | 115       | 1.5236        | 13.5798       |
| 7        | randomized controlled trial | 105       | 1.3911        | 14.9709       |
| 8        | sleep quality               | 83        | 1.0996        | 16.0705       |
| 9        | sleep disorders             | 79        | 1.0466        | 17.1171       |
| 10       | yoga                        | 72        | 0.9539        | 18.0710       |
| 11       | stress                      | 72        | 0.9539        | 19.0249       |
| 12       | quality of life             | 68        | 0.9009        | 19.9258       |
| 13       | cancer                      | 63        | 0.8347        | 20.7605       |
| 14       | meditation                  | 58        | 0.7684        | 21.5289       |
| 15       | mental health               | 49        | 0.6492        | 22.1781       |
| 16       | pain                        | 47        | 0.6227        | 22.8007       |
| 17       | fatigue                     | 46        | 0.6094        | 23.4102       |
| 18       | COVID-19                    | 42        | 0.5564        | 23.9666       |
| 19       | breast cancer               | 38        | 0.5034        | 24.4701       |
| 20       | TCM                         | 35        | 0.4637        | 24.9338       |
| 21       | aromatherapy                | 32        | 0.4240        | 25.3577       |
| 22       | acupressure                 | 31        | 0.4107        | 25.7684       |
| 23       | massage                     | 22        | 0.2915        | 26.0599       |
| 24       | herbal medicine             | 22        | 0.2915        | 26.3514       |
| 25       | Menopause                   | 21        | 0.2782        | 26.6296       |
| 26       | tai chi                     | 20        | 0.2650        | 26.8945       |
| 27       | complementary medicine      | 17        | 0.2252        | 27.1198       |
| 28       | Herb                        | 17        | 0.2252        | 27.3450       |
| 29       | mHealth                     | 15        | 0.1987        | 27.5437       |
| 30       | well-being                  | 15        | 0.1987        | 27.7424       |
| 31       | music therapy               | 15        | 0.1987        | 27.9412       |
